# Supplementary material
Source: publisher figshare collection journal article supplement (https://geolsoc.figshare.com/articles/dataset/_/3453884)

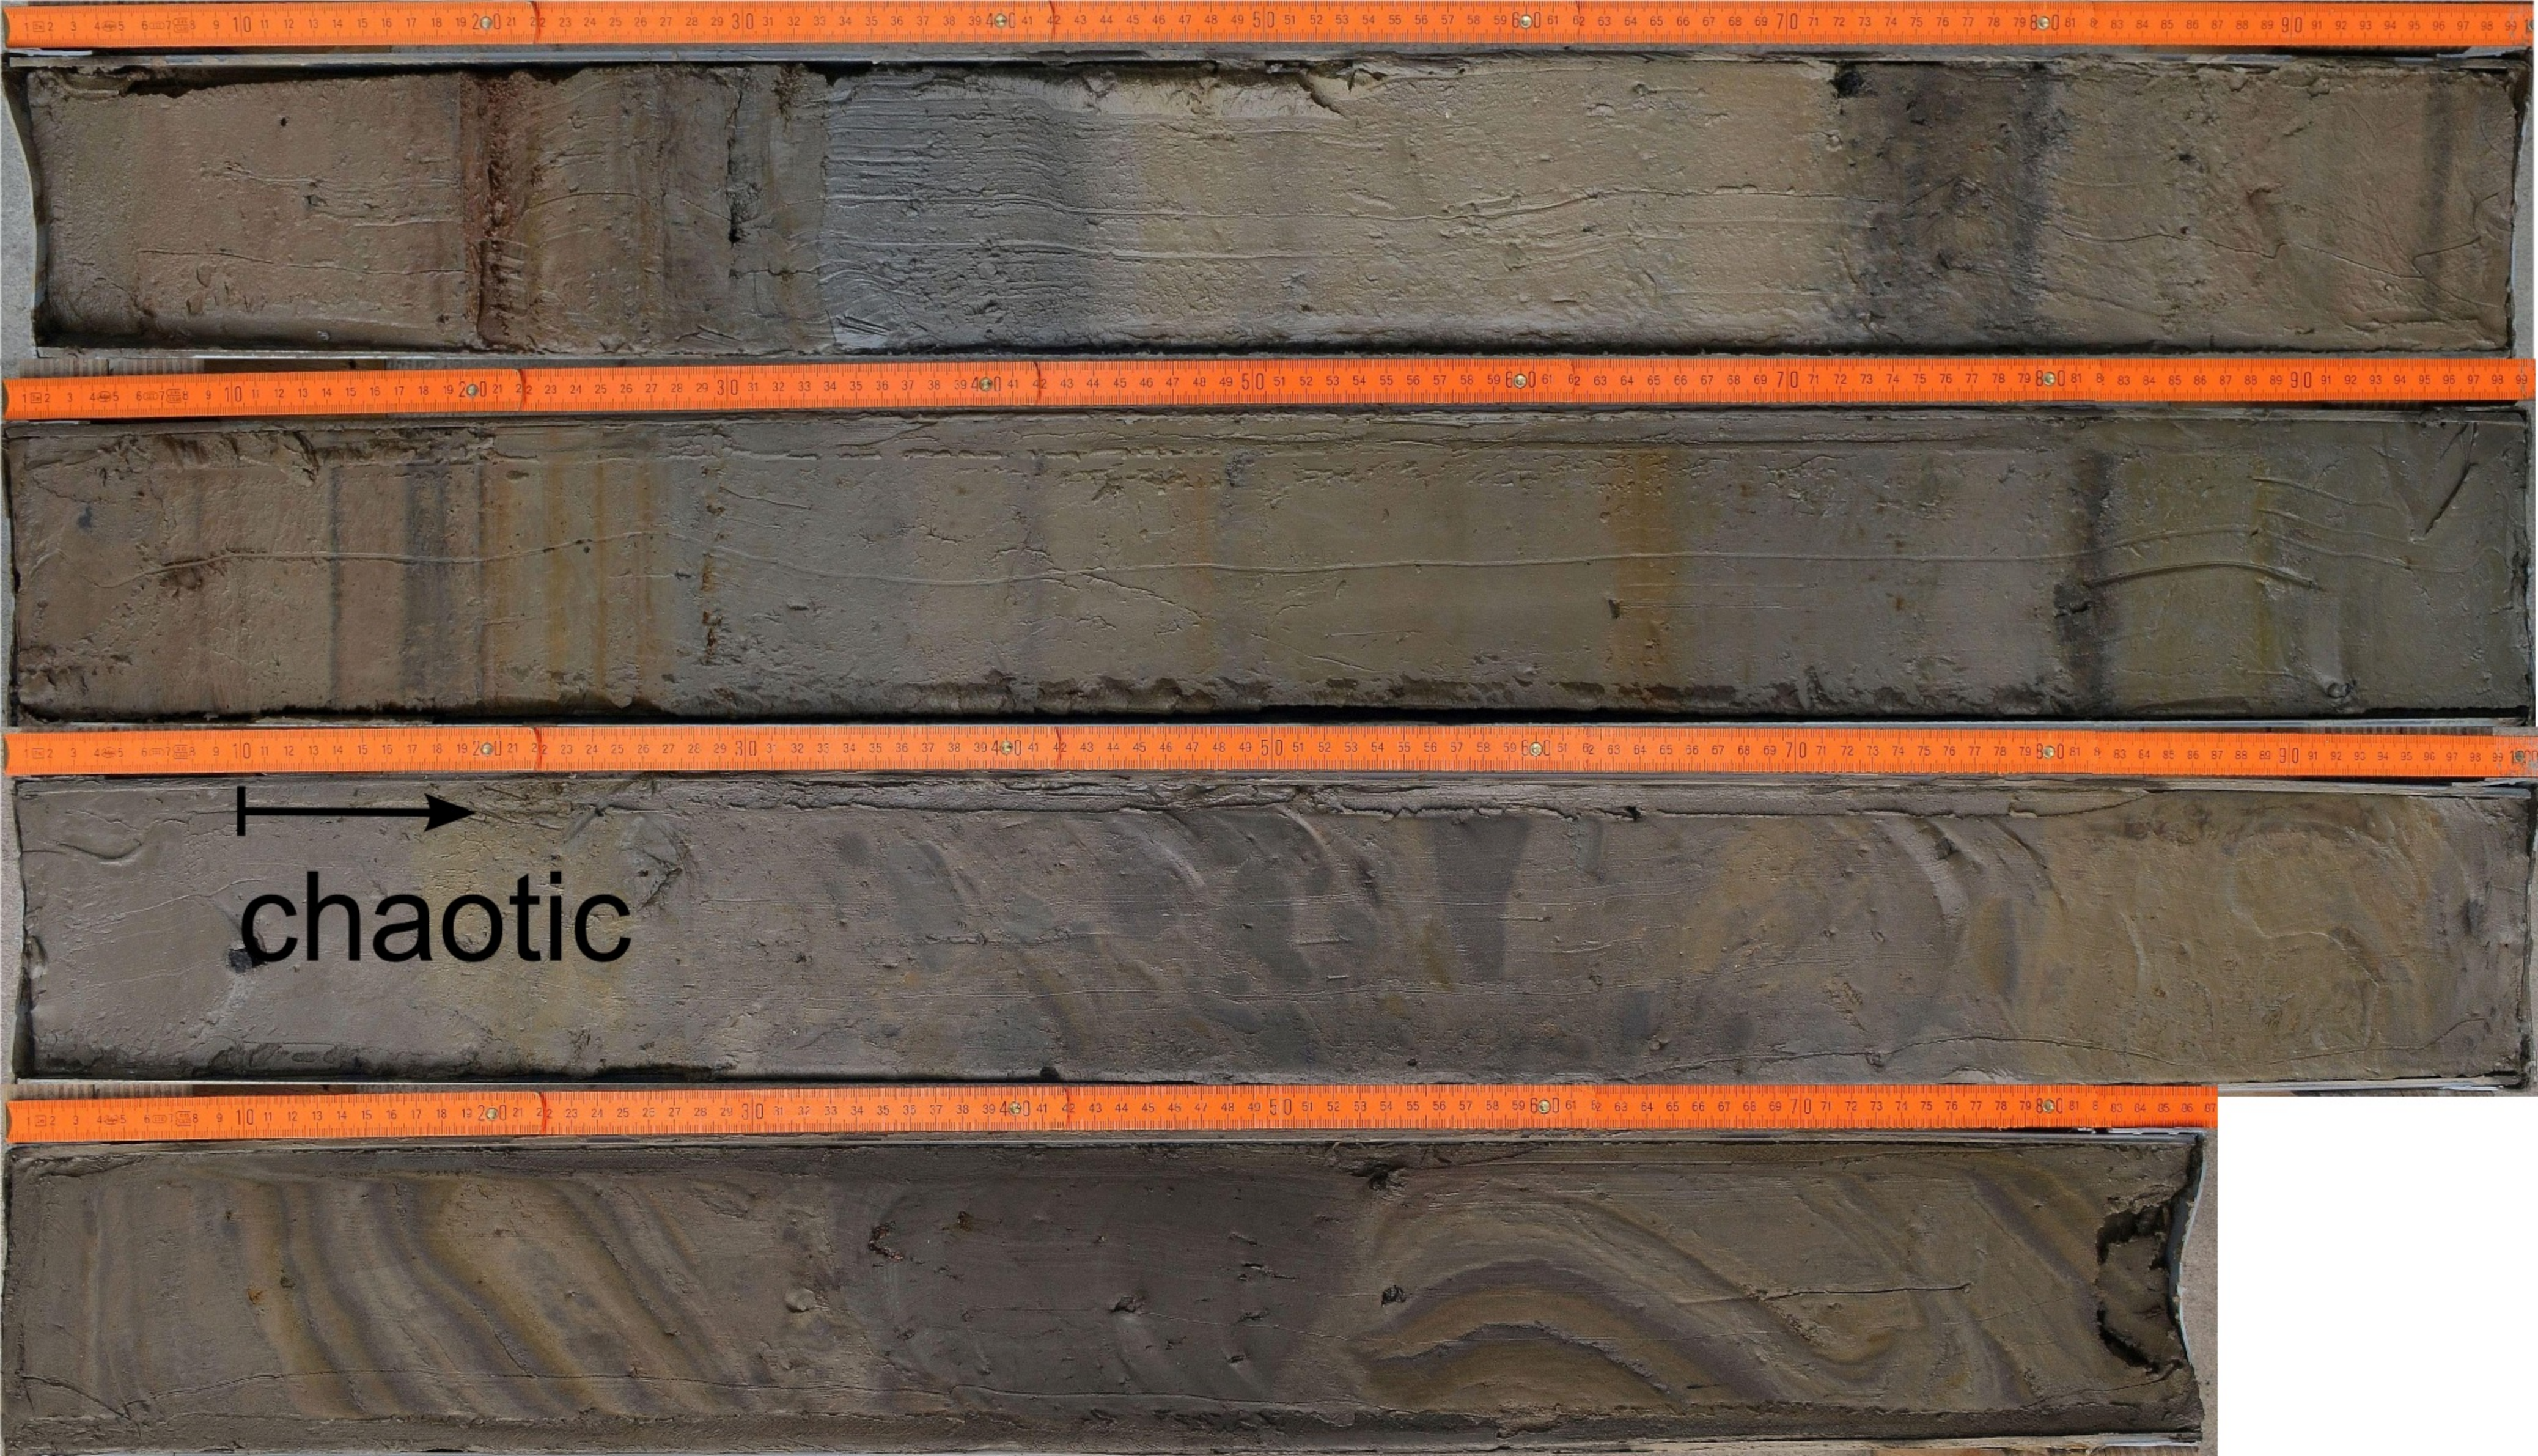

→  
**chaotic**

Supplement: Supplementary file 3 [file 1]
